# Supplementary material for: An ultrahigh responsivity self-powered solar-blind photodetector based on a centimeter-sized β-Ga2O3/polyaniline heterojunction
Source: Royal Society of Chemistry journal article supplement (doi:10.1039/c9nr09095a), 2019-12-16
Supplement: c9nr09095a1.pdf [file c9nr09095a1.pdf]

## Supplementary Information

### Ultrahigh Responsivity Self-powered Solar-blind Photodetector Based on Centimeter-Sized $\beta$ -Ga<sub>2</sub>O<sub>3</sub>/Polyaniline Heterojunction

Yuefei Wang,<sup>‡a</sup> Li Li,<sup>‡b</sup> Hebin Wang,<sup>a</sup> Longxing Su,<sup>c</sup> Hongyu Chen,<sup>\*a</sup> Wanpeng Bian,<sup>a</sup>

Jiangang Ma,<sup>d</sup> Bingsheng Li,<sup>\*d</sup> Zhiguo Liu<sup>\*a</sup> and Aidong Shen<sup>e</sup>

<sup>a</sup> Department of Physics, Harbin Institute of technology, Harbin 150001, China. E-mail: chenhy@hit.edu.cn; liuzhiguo@hit.edu.cn

<sup>b</sup>School of Life Science and Technology, Harbin Institute of Technology, Harbin 150080, China

<sup>c</sup>Department of Physical Science and Technology, ShanghaiTech University, Shanghai 201210, China.

<sup>d</sup>Key Laboratory of UV-Emitting Materials and Technology of Ministry of Education, Northeast Normal University, Changchun 130024, China. E-mail: libs@nenu.edu.cn

<sup>e</sup>Department of Electrical Engineering, The City College of New York, New York 10031, USA.

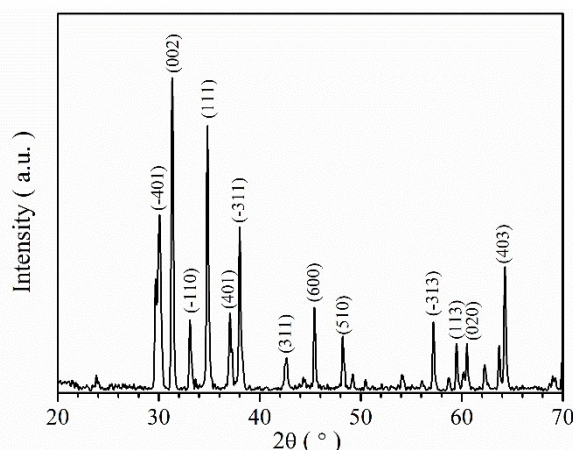

Fig. S1 XRD pattern of Ga<sub>2</sub>O<sub>3</sub> microwires. Because it is difficult to measure a single Ga<sub>2</sub>O<sub>3</sub> microwire, so we placed multiple samples on the substrate. As shown in the figure, the diffraction peaks agree well with the monoclinic phase of Ga<sub>2</sub>O<sub>3</sub>.

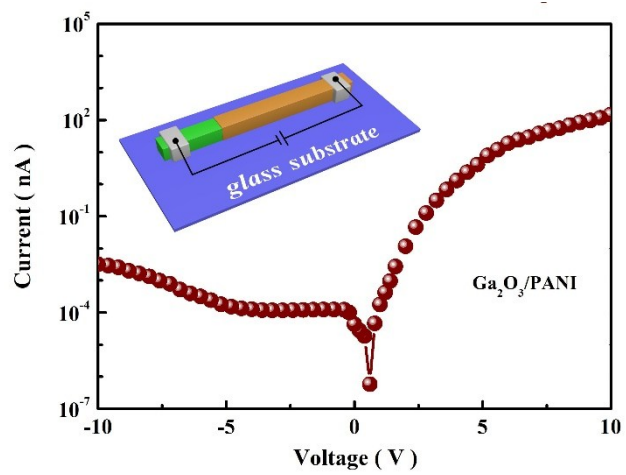

Fig. S2 The I-V curve of  $\beta\text{-Ga}_2\text{O}_3/\text{PANI}$  heterojunction in log scale
